# Supplementary material for: Energy transfer properties of Rhodobacter sphaeroides chromatophores during adaptation to low light intensity
Source: Royal Society of Chemistry journal article supplement (doi:10.1039/c4cp01981d), 2014-01-01
Supplement: c4cp01981d1.pdf [file c4cp01981d1.pdf]

## Supporting Information

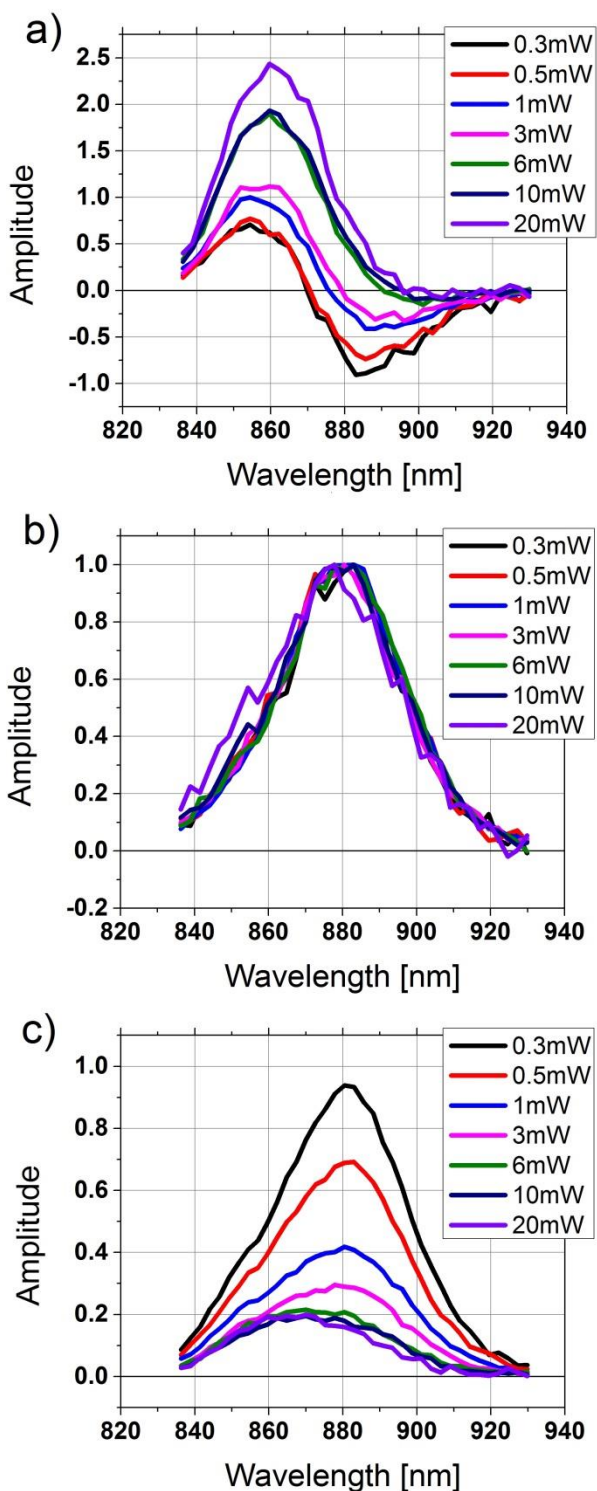

**Figure S1.** DAS obtained from fitting the fluorescence data with different excitation intensity of the 2-hour cells a) DAS1, b) DAS2, c) DAS3. All DAS are scaled in such a way to have the same amplitude of DAS2.

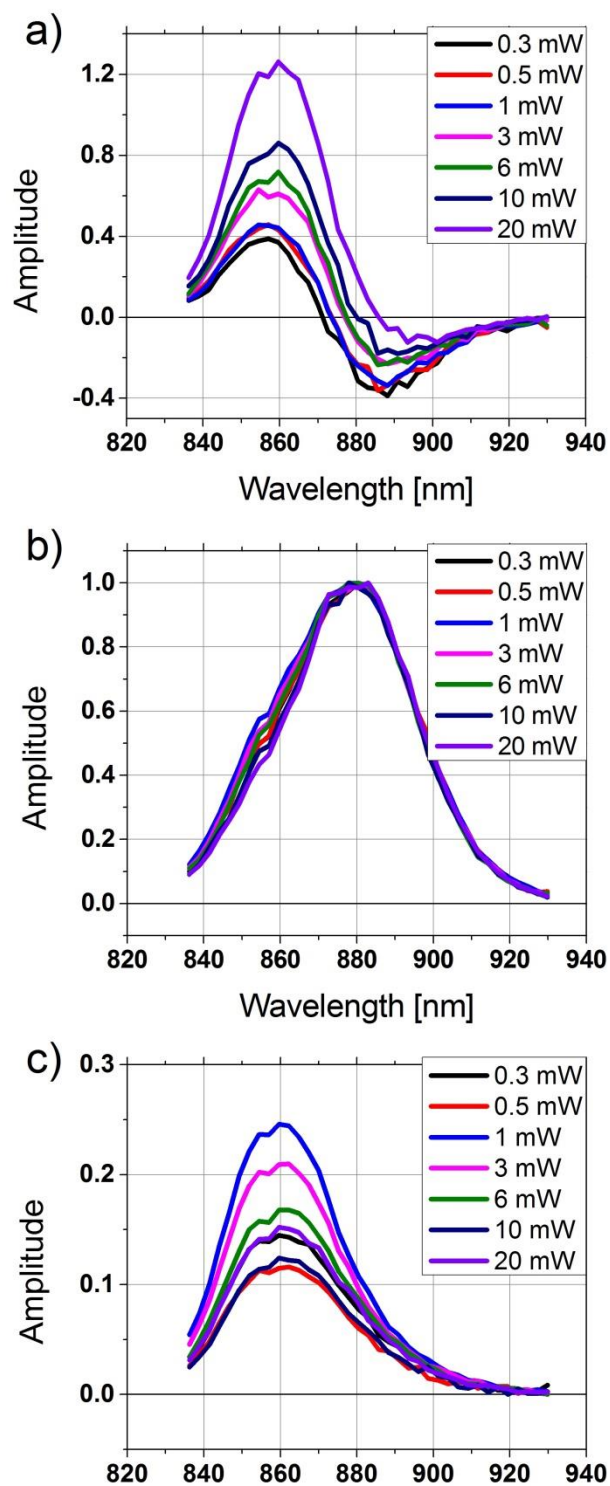

**Figure S2.** DAS obtained from fitting the fluorescence data with different excitation intensity of the 24-hour cells a) DAS1, b) DAS2, c) DAS3. All DAS are scaled in such a way to have the same amplitude of DAS2.

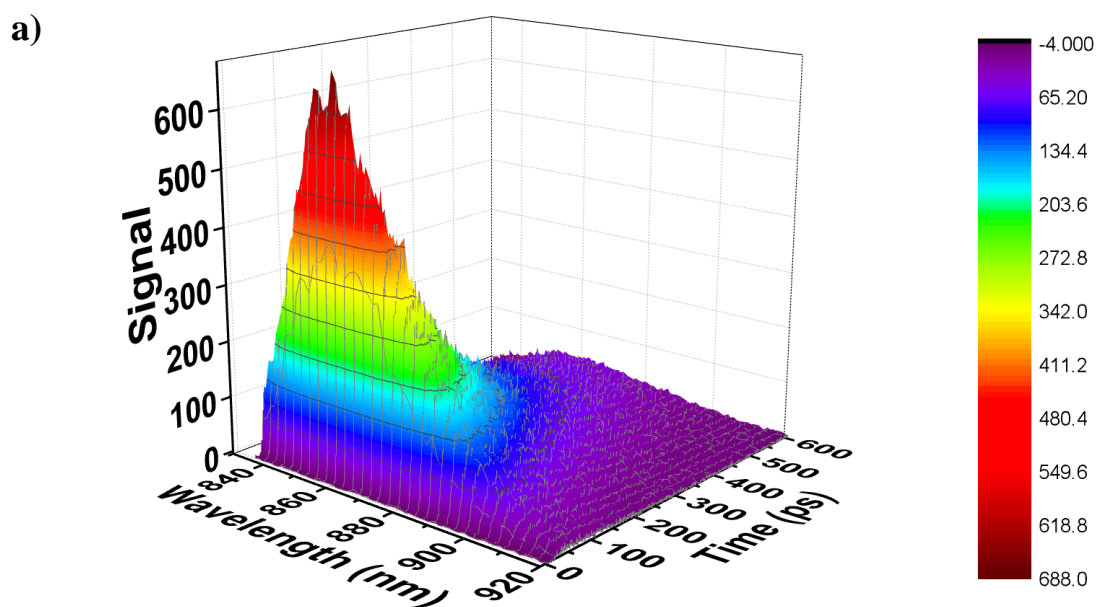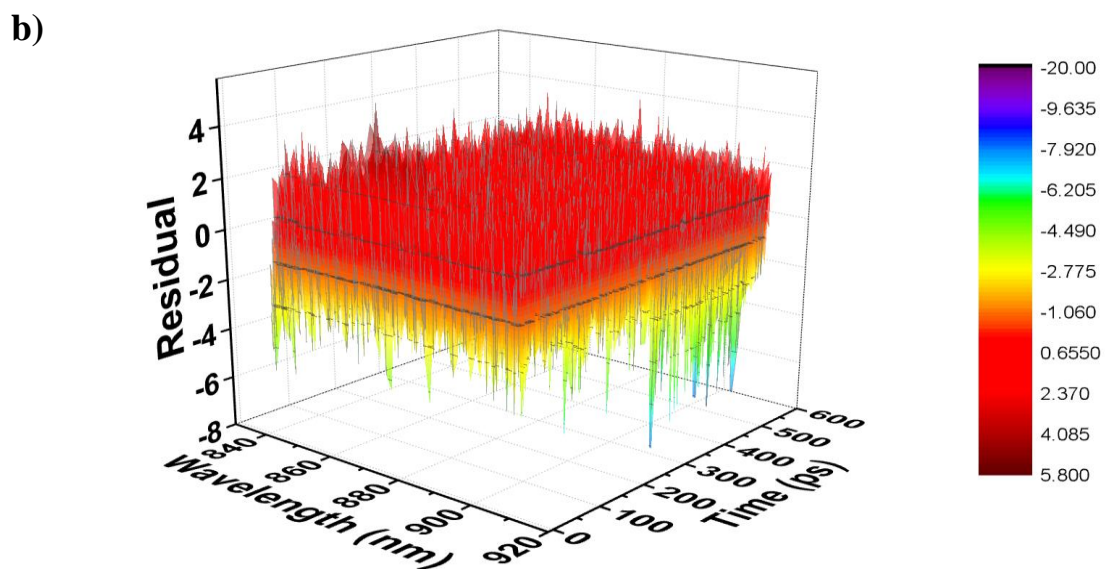

**Figure S3.** Three-dimensional plot of a) fluorescence data recorded from 4-hour cells, and b) residual surface obtained from fitting of the fluorescence data using 3-exponential components.
